# Supplementary material for: Chromosomal and mitochondrial diversity in Melitaea didyma complex (Lepidoptera, Nymphalidae): eleven deeply diverged DNA barcode groups in one non-monophyletic species?
Source: Comp Cytogenet. 2016 Dec 6;10(4):697–717. doi: 10.3897/CompCytogen.v10i4.11069 (PMC5240519; doi:10.3897/CompCytogen.v10i4.11069)
Supplement: Supplementary material 1 — Table S1 [file CompCytogen-010-697-s001.xls]

## Sheet: Лист1
Supplementary Table S1. List of the Melitaea samples used in this study
References: a – Dincă et al. 2015; b – Hausmann et al. 2011; c – Leneveu et al. 2009; d – Wahlberg and Zimmermann 2000; e - Vila and Bjorklund 2004; f - Ashfaq et al. 2013; g – Dincă et al. 2011; h – Pazhenkova et al. 2015, i — Lukhtanov et al. 2009
Original species identification	Species identification accepted in this paper	Haplogroup	BOLD/Collection number	GenBank number	Country	Locality	Ref.
casta	casta		M8	KY086102	Iran		this study
casta	casta		M9	KY086103	Iran		this study
chitralensis	chitralensis	chitralensis		KC158426	Pakistan	Chitral	f
chitralensis	chitralensis	chitralensis		KC158427	Pakistan	Chitral	f
deserticola	deserticola	deserticola	34-12	AF187759	Lebanon	Mohafazat Zahle	d
deserticola	deserticola	deserticola	BPAL2353-14|CCDB-17951 G01	KY086107	Syrien	Damaskus	this study
deserticola	deserticola	deserticola	BPAL2354-14|CCDB-17951 G02	KY086108	Syrien	Damaskus	this study
deserticola	deserticola	deserticola	BPAL3124-15|CCDB-25451 G12	KY086157	Israel	Jerusalem	this study
deserticola	deserticola	deserticola	BPALB150-16|CCDB-25458 E07	KY086193	Israel	Hermon	this study
didyma	didyma	didyma	1 — 7	AF187763	France	Montpellier, Languedoc	d
didyma	didyma	didyma	BPAL2495-14|CCDB-17966 C01	KT874733	Austria	Tirol	h
didyma	didyma	didyma	BPAL2558-14|CCDB-17966 H04	KT874743	Austria	Tirol	h
didyma	didyma	didyma	BPAL2559-14|CCDB-17966 H05	KT874721	Austria	Tirol	h
didyma	didyma	didyma		FJ462252	France	Aude	c
didyma	didyma	didyma		JF415717	Germany	Oberpfalz	b
didyma	didyma	didyma		GU676138	Spain	Huesca	a
didyma	didyma	didyma		KP870744	Spain	Huesca	a
didyma	didyma	didyma		GU669714	Spain	Lleida	a
didyma	didyma	didyma		HM901250	Spain	Valencia, Piscifactoria de La Tosquilla, Titaguas	a
didyma	didyma	didyma		HM901349	Spain	Valencia, Yatova, Sierra Martes	a
didyma	didyma	didyma		HM901809	Spain	Zaragoza	a
didyma	didyma	didyma		HM901810	Spain	Zaragoza	a
didyma	didyma	didyma		GU676943	Spain	Valencia, Teresa de Cofrentes, arroyo Cangrejos, Cofrentes	a
didymoides	didymoides	didymoides	026-1	AF187762	Russia	Buryatia, Dodo-Enchor	d
didymoides	didymoides	didymoides	BPAL2546-14|CCDB-17966 G04	KT874750	Mongolia	Selenge Aimak	h
didymoides	didymoides	didymoides	BPAL2547-14|CCDB-17966 G05	KT874727	China	Beijing Municipality	h
didymoides	didymoides	didymoides	BPAL3375-16|CCDB-25452 E02	KY086168	Russia	Buryatia	this study
didymoides	didymoides	didymoides	BPAL3493-16|CCDB-25456 G01	KY086178	Russia	Buryatia	this study
gina	gina	gina	BPAL1697-12|CCDB-03033 G10	KY086104	Azerbaijan	Azerbaijan, Shamkir	this study
gina	gina	gina	BPAL2350-14|CCDB-17951 F10	KY086106	Iran	30 km S Marivan	this study
gina	gina	gina	BPAL2783-15|CCDB-17969 C04	KY086118	Iran	Kuh-e-Tamandar	this study
gina	gina	gina	BPAL2784-15|CCDB-17969 C05	KY086119	Iran	Kuh-e-Tamandar	this study
gina	gina	gina	BPAL2786-15|CCDB-17969 C07	KY086120	Iran	Kuh-e-Tamandar	this study
gina	gina	gina	BPAL2951-15|CCDB-25450 A06	KY086123	Iran	Gilan	this study
gina	gina	gina	BPAL2952-15|CCDB-25450 A07	KY086124	Iran	Gilan	this study
gina	gina	gina	BPAL3068-15|CCDB-25451 C04	KY086146	Iran	Khansar	this study
gina	gina	gina	BPAL3069-15|CCDB-25451 C05	KY086147	Iran	Khansar	this study
gina	gina	gina	BPAL3078-15|CCDB-25451 D02	KY086148	Iran	Fereydun Shahr	this study
gina	gina	gina	BPAL3079-15|CCDB-25451 D03	KY086149	Iran	Saqgez-Baneh	this study
gina	gina	gina	BPAL3081-15|CCDB-25451 D05	KY086150	Iran	N Chenareh	this study
gina	gina	gina	BPAL3082-15|CCDB-25451 D06	KY086151	Iran		this study
gina	gina	gina	BPAL3083-15|CCDB-25451 D07	KY086152	Iran		this study
gina	gina	gina	M1	KY086198	Iran	Zedasht	this study
gina	gina	gina	M10	KY086199	Iran	E of Senandaj	this study
gina	gina	gina	M11	KY086200	Iran	E of Senandaj	this study
gina	gina	gina	M12	KY086201	Iran	E of Senandaj	this study
gina	gina	gina	M14 (Q156)	KY086202	Iran	27 E of Mahabad	this study
gina	gina	gina	M15 (Q157)	KY086203	Iran	27 E of Mahabad	this study
gina	gina	gina	M16 (Q158)	KY086204	Iran	27 E of Mahabad	this study
gina	gina	gina	M17	KY086205	Iran	27 E of Mahabad	this study
gina	gina	gina	M2	KY086206	Iran	Zedasht	this study
gina	gina	gina	M20	KY086207	Iran	23 E of Mahabad	this study
gina	gina	gina	M21	KY086208	Iran	W of Mahabad	this study
gina	gina	gina2	M22	KY086209	Iran	Seir	this study
gina	gina	gina	M23	KY086210	Iran	Seir	this study
gina	gina	gina	M25	KY086211	Iran	Iran, 2nd pass	this study
gina	gina	gina	M3	KY086213	Iran	Zedasht	this study
gina	gina	gina	M4	KY086214	Iran	Zedasht	this study
gina	gina	gina	M5	KY086215	Iran	Soutekesh	this study
gina	gina	gina	M7	KY086216	Iran	Saravand	this study
gina	gina	gina		FJ462258	Iran	Dascht-e-Arjan	c
interrupta	interrupta	interrupta	BPAL1706-12|CCDB-03033 H07	KT874734	Daghestan		h
interrupta	interrupta	interrupta	BPAL1710-12|CCDB-03033 H11	KT874705	Russia	Kuban	h
interrupta	interrupta	interrupta	BPAL2539-14|CCDB-17966 F09	KT874741	Armenia		h
interrupta	interrupta	interrupta	BPAL2540-14|CCDB-17966 F10	KT874702	Armenia		h
interrupta	interrupta	interrupta	BPAL2541-14|CCDB-17966 F11	KT874740	Armenia		h
interrupta	interrupta	interrupta	BPAL2968-15|CCDB-25450 B11	KY086125	Georgia	Akhaldoba	this study
interrupta	interrupta	interrupta	BPAL2971-15|CCDB-25450 C02	KY086127	Georgia	Sagrdze	this study
interrupta	interrupta	interrupta	BPAL2972-15|CCDB-25450 C03	KY086128	Georgia	Adjara, Chanchkhalo	this study
interrupta	interrupta	interrupta	BPAL2973-15|CCDB-25450 C04	KY086129	Georgia	Adjara, Chanchkhalo	this study
interrupta	interrupta	interrupta	BPAL3001-15|CCDB-25450 E08	KY086136	Georgia	Akhaltsikhe	this study
interrupta	interrupta	interrupta	BPAL3002-15|CCDB-25450 E09	KY086137	Georgia	Akhaltsikhe	this study
interrupta	interrupta	interrupta	BPAL3015-15|CCDB-25450 F10	KY086138	Georgia	Akhaltsikhe	this study
interrupta	interrupta	interrupta	BPAL3019-15|CCDB-25450 G02	KY086139	Georgia	Bakuriani	this study
interrupta	interrupta	interrupta	BPAL3020-15|CCDB-25450 G03	KY086140	Georgia	Bakuriani	this study
interrupta	interrupta	interrupta	LOWAB282-09		Turkey	Kachkar Mts	h
interrupta	interrupta	interrupta		FJ462260	Russia	N. Caucasus Arkhyz	c
interrupta	interrupta	interrupta		AF187809	Russia	NW Caucasus, Arkhyz	d
didyma pseudolatonigena	latonigena	latonigena	BPAL2471-14|CCDB-17966 A01	KT874714	Russia	N. Tuva	h
didyma pseudolatonigena	latonigena	latonigena	BPAL2472-14|CCDB-17966 A02	KT874728	Russia	N. Tuva	h
latonigena	latonigena	latonigena	BPAL3475-16|CCDB-25456 E07	KY086169	Russia	Altai	this study
latonigena	latonigena	latonigena	BPAL3476-16|CCDB-25456 E08	KY086170	Russia	Altai	this study
latonigena	latonigena	latonigena	BPAL3477-16|CCDB-25456 E09	KY086171	Russia	Altai	this study
latonigena	latonigena	latonigena	BPAL3489-16|CCDB-25456 F09	KY086177	Russia	Buryatia	this study
latonigena	latonigena	latonigena		FJ663792	Russia	Altai	c
latonigena	latonigena	latonigena		FJ663793	Russia	Altai	c
latonigena	latonigena	latonigena		FJ663794	Russia	Altai	c
latonigena	latonigena	latonigena	BPAL2283-14|CCDB-17951 A03	KT874739	Russia	Buryatia	h
latonigena	latonigena	latonigena	BPAL2284-14|CCDB-17951 A04	KT874704	Russia	Buryatia	h
latonigena	latonigena	latonigena		AY346234	Russia	Buryatia	e
latonigena	latonigena	latonigena		AY350460	Russia	Buryatia	e
latonigena	latonigena	latonigena		AY350461	Russia	Buryatia	e
didyma	didyma liliputana	liliputana	BPAL2296-14|CCDB-17951 B04	KT874738	Syria	Damaskus	h
didyma	didyma liliputana	liliputana	BPAL2501-14|CCDB-17966 C07	KT874748	Armenia	Garni	h
didyma	didyma liliputana	liliputana	BPAL2718-14|CCDB-17968 E10	KT874744	Israel	Hermon	h
liliputana	didyma liliputana	liliputana	BPAL3293-16|CCDB-25454 F03	KY086166	Turkey	Torul	this study
liliputana	didyma liliputana	liliputana	BPAL3294-16|CCDB-25454 F04	KY086167	Turkey	Torul	this study
liliputana	didyma liliputana	liliputana	BPALB134-16|CCDB-25458 D03	KY086186	Israel	Hermon	this study
liliputana	didyma liliputana	liliputana	BPALB135-16|CCDB-25458 D04	KY086187	Israel	Hermon	this study
liliputana	didyma liliputana	liliputana	BPALB136-16|CCDB-25458 D05	KY086188	Israel	Hermon	this study
liliputana	didyma liliputana	liliputana	BPALB137-16|CCDB-25458 D06	KY086189	Israel	Hermon	this study
liliputana	didyma liliputana	liliputana	BPALB139-16|CCDB-25458 D08	KY086190	Israel	Hermon	this study
liliputana	didyma liliputana	liliputana	BPALB142-16|CCDB-25458 D11	KY086191	Israel	Hermon	this study
liliputana	didyma liliputana	liliputana	BPALB143-16|CCDB-25458 D12	KY086192	Israel	Hermon	this study
liliputana	didyma liliputana	liliputana	LOWAB015-07|LOWA-AR-15		Armenia		this study
liliputana	didyma liliputana	liliputana	LOWAB016-07|LOWA-AR-16		Armenia		this study
liliputana	didyma liliputana	liliputana	LOWAB063-07|LOWA-AR-63		Armenia		this study
didyma	didyma mauretanica	mauretanica		GU676464	Spain	Granada	a
didyma	didyma mauretanica	mauretanica		HQ562781	Spain	Granada	a
didyma	didyma mauretanica	mauretanica		HQ562782	Spain	Granada	a
didyma	didyma mauretanica	mauretanica		HQ562783	Spain	Granada	a
didyma	didyma mauretanica	mauretanica		KP870593	Spain	Granada	a
didyma	didyma mauretanica	mauretanica		KP870659	Spain	Granada	a
nadezhdae	mixta	mixta	BPAL2292-14|CCDB-17951 A12	KT874699	Tadjikistan	Peter I Range	h
nadezhdae	mixta	mixta	BPAL2465-14|CCDB-17950 H06	KT874719	Aphganistan		h
nadezhdae	mixta	mixta	BPAL2467-14|CCDB-17950 H08	KT874708	Aphganistan		h
enarea	mixta	mixta	BPAL2486-14|CCDB-17966 B04	KT874711	Tajikistan	Peter I Range	h
enarea	mixta	mixta	BPAL2488-14|CCDB-17966 B06	KT874731	Tajikistan		h
didyma	mixta	mixta	BPAL2509-14|CCDB-17966 D03	KT874722	Tadjikistan	Pendzhikent Farob	h
enarea	mixta	mixta		FJ462256	Tadjikistan	W. Pamir	c
chitralensis	mixta	mixta		FJ462242	Tajikistan	W. Pamir Rushan	c
montium	montium		BPAL2235-13|CCDB-17949 E02	KT874697	Israel		h
montium	montium		BPAL2236-13|CCDB-17949 E03	KT874736	Israel		h
didyma	didyma neera	neera	92015	KT792898	Russia	Samara	h
didyma	didyma neera	neera	188031	KT792899	Russia	Orenburg distr, Tugustemir	h
didyma	didyma neera	neera	224011	KT792900	Russia	Bashkiria, Zilair	h
didyma	didyma neera	neera	225015	KT792901	Russia	Samara	h
didyma	didyma neera	neera	226015	KT792902	Russia	Samara	h
didyma	didyma neera	neera	227015	KT792903	Russia	Samara	h
didyma	didyma neera	neera	229016	KT792905	Russia	Samara	h
didyma	didyma neera	neera	BPAL1690-12|CCDB-03033 G03	KT874713	Russia	Daghestan, Talgi	h
interrupta	didyma neera	neera	BPAL1702-12|CCDB-03033 H03	KT874706	Russia	North Osetia, pass Archonsky	h
didyma	didyma neera	neera	BPAL1707-12|CCDB-03033 H08	KT874716	Russia	Daghestan, Talgi	h
didyma	didyma neera	neera	BPAL2499-14|CCDB-17966 C05	KT874709	Kazakhstan	Aktobe	h
didyma	didyma neera	neera	BPAL2554-14|CCDB-17966 G12	KT874720	Russia	Kaluga	h
didyma	didyma neera	neera	BPAL2555-14|CCDB-17966 H01	KT874730	Russia	Voronezh	h
didyma	didyma neera	neera	BPAL2767-15|CCDB-17969 A12	KY086112	Kazakhstan	Karabiryuk	this study
neera	didyma neera	neera	BPAL2946-15|CCDB-25450 A01	KY086121	Kazakhstan	Altai, Chirkain	this study
neera	didyma neera	neera	BPAL2947-15|CCDB-25450 A02	KY086122	Kazakhstan	Altai, Chirkain	this study
neera	didyma neera	neera	BPAL2969-15|CCDB-25450 B12	KY086126	Bulgaria	Emen	this study
neera	didyma neera	neera	BPAL2997-15|CCDB-25450 E04	KY086133	Kazakhstan	Karabiryuk	this study
neera	didyma neera	neera	BPAL3023-15|CCDB-25450 G06	KY086141	Russia	Orenburg distr, Mednogorsk	this study
neera	didyma neera	neera	BPAL3035-15|CCDB-25450 H06	KY086142	Russia	Orenburg distr, Mednogorsk	this study
neera	didyma neera	neera	BPAL3036-15|CCDB-25450 H07	KY086143	Russia	Orenburg distr, Luch Truda	this study
neera	didyma neera	neera	BPAL3044-15|CCDB-25451 A04	KY086144	Russia	Samarskaya obl, Bachilova polyana	this study
neera	didyma neera	neera	BPAL3048-15|CCDB-25451 A08	KY086145	Russia	Samarskaya obl, Bachilova polyana	this study
neera	didyma neera	neera	BPAL3086-15|CCDB-25451 D10	KY086153	Greece	Pades	this study
neera	didyma neera	neera	BPAL3087-15|CCDB-25451 D11	KY086154	Bulgaria	Hvoyna	this study
neera	didyma neera	neera	BPAL3089-15|CCDB-25451 E01	KY086155	Slovenia	Jagnjenica	this study
neera	didyma neera	neera	BPAL3164-16|CCDB-25453 C05	KY086158	Greece	Timfristos	this study
neera	didyma neera	neera	BPAL3165-16|CCDB-25453 C06	KY086159	Greece	Kalavrita	this study
neera	didyma neera	neera	BPAL3166-16|CCDB-25453 C07	KY086160	Greece	Kalavrita	this study
neera	didyma neera	neera	BPAL3167-16|CCDB-25453 C08	KY086161	Greece	Kalavrita	this study
neera	didyma neera	neera	BPAL3478-16|CCDB-25456 E10	KY086172	Kazakhstan	Aktobe	this study
neera	didyma neera	neera	BPAL3479-16|CCDB-25456 E11	KY086173	Kazakhstan	Aktobe	this study
neera	didyma neera	neera	BPAL3480-16|CCDB-25456 E12	KY086174	Kazakhstan	Aktobe	this study
neera	didyma neera	neera	BPAL3482-16|CCDB-25456 F02	KY086175	Kazakhstan	Aktobe	this study
neera	didyma neera	neera	BPAL3488-16|CCDB-25456 F08	KY086176	Kazakhstan	Turgusun	this study
neera	didyma neera	neera	BPALB186-16|CCDB-25458 H07	KY086194	Russia	Khakassia	this study
neera	didyma neera	neera	BPALB187-16|CCDB-25458 H08	KY086195	Russia	Khakassia	this study
neera	didyma neera	neera	BPALB189-16|CCDB-25458 H10	KY086197	Russia	Khakassia	this study
neera	didyma neera	neera	BPALB190-16|CCDB-25458 H11	KY086196	Russia	Khakassia	this study
neera	didyma neera	neera	M27	KY086212	Bulgaria	Hvoyna	this study
didyma	didyma neera	neera	MD11	KT792908	Bulgaria		h
didyma	didyma neera	neera		FJ663786	Kazakhstan	Altai	i
didyma	didyma neera	neera		FJ663787	Kazakhstan	Altai	i
didyma	didyma neera	neera		FJ663788	Kazakhstan	Altai	i
didyma	didyma neera	neera		KP870704	Romania	Maramures	a
didyma	didyma neera	neera		HQ004789	Romania	Oltenia	g
didyma	didyma neera	neera		HQ004790	Romania	Transylvania	g
didyma	didyma neera	neera		HQ004791	Romania	Transylvania	g
didyma	didyma neera	neera		HQ004792	Romania	Transylvania	g
didyma	didyma neera	neera		HQ004793	Romania	Transylvania	g
didyma	didyma neera	neera		KP870749	Romania	Transylvania	a
didyma	didyma neera	neera		FJ462249	Russia	Udmurtia Kilmez'	c
neera	didyma neera	neera 2	BPAL3090-15|CCDB-25451 E02	KY086156	Slovenia	Jagnjenica	this study
didyma	didyma occidentalis	occidentalis		GU669712	Spain	Barcelona	a
didyma	didyma occidentalis	occidentalis		GU669713	Spain	Barcelona	a
didyma	didyma occidentalis	occidentalis		GU676256	Spain	Cantabria	a
didyma	didyma occidentalis	occidentalis		HM901300	Spain	Cantabria	a
didyma	didyma occidentalis	occidentalis		HM901249	Spain	Castellon	a
didyma	didyma occidentalis	occidentalis		HM901825	Spain	Castellon	a
didyma	didyma occidentalis	occidentalis		FJ462251	Spain	Catalonia	c
didyma	didyma occidentalis	occidentalis		GU676247	Spain	Comunidad de Madrid	a
didyma	didyma occidentalis	occidentalis		HM901270	Spain	Comunidad de Madrid	a
didyma	didyma occidentalis	occidentalis		HM901283	Spain	Comunidad de Madrid	a
didyma	didyma occidentalis	occidentalis		HM901221	Spain	Cuenca	a
didyma	didyma occidentalis	occidentalis		GU669715	Spain	Girona	a
didyma	didyma occidentalis	occidentalis		HM901292	Spain	Guadalajara	a
didyma	didyma occidentalis	occidentalis		HM901293	Spain	Guadalajara	a
didyma	didyma occidentalis	occidentalis		GU675881	Spain	Teruel	a
didyma	didyma occidentalis	occidentalis		GU676395	Spain	Teruel	a
didyma	didyma occidentalis	occidentalis		HM901251	Spain	Valencia, Casa de Camineros,Tuejar	a
didyma occidentalis	didyma protaeoccidentis	protaeoccidentis	BPAL2297-14|CCDB-17951 B05	KT874712	Morocco		h
didyma	didyma protaeoccidentis	protaeoccidentis		FJ462253	Morocco	Atlas, 3 km S Col du Zad	c
saxatilis	saxatilis	saxatilis		FJ462281	Iran	Tehran	c
sutschana	sutschana	sutschana	BPAL2543-14|CCDB-17966 G01	KT874696	Russia	Chita	h
sutschana	sutschana	sutschana	BPAL2544-14|CCDB-17966 G02	KT874717	Russia	Chita	h
sutschana	sutschana	sutschana	BPAL2545-14|CCDB-17966 G03	KT874701	Russia	Chita	h
sutschana	sutschana	sutschana		AF187805	Russia	Chita region, Kyra	d
didymoides	sutschana	sutschana 2		FJ462254	China	Hebei	c
sutschana	sutschana	sutschana 3	BPAL2309-14|CCDB-17951 C05	KY086105	Russia	Primorskij Kray	this study
didyma	didyma turkestanica	turkestanica	228015	KT792904	Russia	Samara	h
didyma	didyma turkestanica	turkestanica	BPAL098-10|RPVL-00098	HM404715	China	Urumchi Khami Nanshangou
didyma	didyma turkestanica	turkestanica	BPAL099-10|RPVL-00099	HM404716	China	Urumchi Khami Nanshangou
didyma	didyma turkestanica	turkestanica	BPAL102-10|RPVL-00102	HM404718	China	Urumchi Khami Karlyktag
didyma	didyma turkestanica	turkestanica	BPAL2290-14|CCDB-17951 A10	KT874698	China	Urumchi	h
didyma	didyma turkestanica	turkestanica	BPAL2291-14|CCDB-17951 A11	KT874725	China	Urumchi	h
didyma	didyma turkestanica	turkestanica	BPAL2496-14|CCDB-17966 C02	KT874695	Kazakhstan	Altai, Tchernyi Irtysh	h
didyma	didyma turkestanica	turkestanica	BPAL2497-14|CCDB-17966 C03	KT874737	Kazakhstan	Altai, Tchernyi Irtysh	h
didyma	didyma turkestanica	turkestanica	BPAL2498-14|CCDB-17966 C04	KT874735	Kazakhstan	Altai	h
didyma	didyma turkestanica	turkestanica	BPAL2500-14|CCDB-17966 C06	KT874703	Kazakhstan	Aktiobe	h
didyma	didyma turkestanica	turkestanica	BPAL2502-14|CCDB-17966 C08	KT874718	Kazakhstan	Alma-Ata	h
didyma	didyma turkestanica	turkestanica	BPAL2503-14|CCDB-17966 C09	KT874707	Kazakhstan	Alma-Ata	h
didyma	didyma turkestanica	turkestanica	BPAL2504-14|CCDB-17966 C10	KT874710	Kyrgyzstan	Kadzhi-Sai	h
didyma	didyma turkestanica	turkestanica	BPAL2505-14|CCDB-17966 C11	KT874742	Kyrgyzstan	Kadzhi-Sai	h
didyma	didyma turkestanica	turkestanica	BPAL2506-14|CCDB-17966 C12	KT874726	Uzbekistan	Nuratau Sarmitan	h
turkestanica	didyma turkestanica	turkestanica	BPAL2507-14|CCDB-17966 D01	KY086109	Uzbekistan	Nuratau, Sarmitan	this study
didyma	didyma turkestanica	turkestanica	BPAL2510-14|CCDB-17966 D04	KT874694	Tadjikistan	Kuraminski Mts Altyn Topkan	h
didyma	didyma turkestanica	turkestanica	BPAL2511-14|CCDB-17966 D05	KT874715	Tadjikistan	Kuraminski Mts Altyn Topkan	h
didyma	didyma turkestanica	turkestanica	BPAL2557-14|CCDB-17966 H03	KT874746	Kyrgyzstan	Talassky Mts. Kara-Bura	h
turkestanica	didyma turkestanica	turkestanica	BPAL2766-15|CCDB-17969 A11	KY086111	Kazakhstan	Karabiryuk	this study
turkestanica	didyma turkestanica	turkestanica	BPAL2991-15|CCDB-25450 D10	KY086130	Kazakhstan	Karabiryuk	this study
turkestanica	didyma turkestanica	turkestanica	BPAL2992-15|CCDB-25450 D11	KY086131	Kazakhstan	Karabiryuk	this study
turkestanica	didyma turkestanica	turkestanica	BPAL2995-15|CCDB-25450 E02	KY086132	Kazakhstan	Karabiryuk	this study
turkestanica	didyma turkestanica	turkestanica	BPAL2998-15|CCDB-25450 E05	KY086134	Kazakhstan	Karabiryuk	this study
turkestanica	didyma turkestanica	turkestanica	BPAL2999-15|CCDB-25450 E06	KY086135	Kazakhstan	Karabiryuk	this study
turkestanica	didyma turkestanica	turkestanica	BPAL3168-16|CCDB-25453 C09	KY086162	Russia	Astrakhan oblast	this study
turkestanica	didyma turkestanica	turkestanica	BPAL3169-16|CCDB-25453 C10	KY086163	Russia	Astrakhan oblast	this study
turkestanica	didyma turkestanica	turkestanica	BPAL3170-16|CCDB-25453 C11	KY086164	Russia	Astrakhan oblast	this study
turkestanica	didyma turkestanica	turkestanica	BPAL3173-16|CCDB-25453 D02	KY086165	Russia	Astrakhan oblast	this study
turkestanica	didyma turkestanica	turkestanica	BPAL3496-16|CCDB-25456 G04	KY086179	Kazakhstan	Kaindy	this study
turkestanica	didyma turkestanica	turkestanica	BPAL3503-16|CCDB-25456 G11	KY086180	Kyrgyzstan	Talas Mts Kara-Bura	this study
turkestanica	didyma turkestanica	turkestanica	BPAL3504-16|CCDB-25456 G12	KY086181	Kyrgyzstan	Talas Mts Kara-Bura	this study
turkestanica	didyma turkestanica	turkestanica	BPAL3505-16|CCDB-25456 H01	KY086182	Kyrgyzstan	Talas Mts Kara-Bura	this study
ninae	didyma turkestanica	turkestanica		FJ462269	Kyrgyzstan	N. Chatkal Chamach	c
didyma	didyma turkestanica	turkestanica		FJ462250	Kyrgyzstan	Suusamyr Mts Kyzyl-Oi	c
turkestanica	didyma turkestanica	turkestanica	BPAL2769-15|CCDB-17969 B02	KY086114	Kazakhstan	Karabiryuk	this study
turkestanica	didyma turkestanica	turkestanica	BPAL2770-15|CCDB-17969 B03	KY086115	Kazakhstan	Saikan	this study
turkestanica	didyma turkestanica	turkestanica	BPAL2772-15|CCDB-17969 B05	KY086117	Kazakhstan	Saikan	this study
turkestanica	didyma turkestanica	turkestanica	BPAL3513-16|CCDB-25456 H09	KY086184	Kazakhstan	Karzhan	this study
turkestanica	didyma turkestanica	turkestanica	BPAL3514-16|CCDB-25456 H10	KY086185	Kazakhstan	Karzhan	this study
turkestanica	didyma turkestanica	turkestanica 2	BPAL2771-15|CCDB-17969 B04	KY086116	Kazakhstan	Saikan	this study
turkestanica	didyma turkestanica	turkestanica 2	BPAL3512-16|CCDB-25456 H08	KY086183	Kazakhstan	Tentek Ucharal	this study
didyma	didyma turkestanica	turkestanica 3	BPAL2507-14|CCDB-17966 D01	KT874745	Uzbekistan	Nuratau Sarmitan	h
turkestanica	didyma turkestanica	turkestanica 3	BPAL2556-14|CCDB-17966 H02	KY086110	Kazakhstan	Karzhantau	this study
turkestanica	didyma turkestanica	turkestanica 4	BPAL2768-15|CCDB-17969 B01	KY086113	Kazakhstan	Karabiryuk	this study
telona	telona		BPAL2214-13|CCDB-17949_C05	KT874693	Israel		h
telona	telona		BPAL2215-13|CCDB-17949_C06	KT874729	Israel		h
telona	telona		BPAL2265-13|CCDB-17949_G08	KT874724	Israel		h
telona	telona		BPAL2266-13|CCDB-17949_G09	KT874747	Israel		h
telona	telona		BPAL2267-13|CCDB-17949_G10	KT874749	Israel		h
telona	telona		BPAL2717-14|CCDB-17968_E09	KT874723	Israel		h
persea	persea			FJ462273	Iran	Ardabil	c
persea	persea			AF187796	Lebanon	Les Cedres, Mohafazat Beharre´	d
trivia	trivia			HQ004812	Romania		g
trivia	trivia			HQ004813	Romania		g
trivia	trivia			HQ004814	Romania		g
trivia	trivia			HQ004815	Romania		g
trivia	trivia			HQ004816	Romania		g
trivia	trivia			HQ004817	Romania		g
trivia	trivia			HQ004818	Romania		g
phoebe	phoebe			HQ004810	Romania		g
phoebe	phoebe			KT792907	Russia	Samara	h
phoebe	phoebe			KT792906	Russia	Samara	h

## Sheet: Лист2
BankIt1966443 BPAL1697-12
BankIt1966443 BPAL2309-14
BankIt1966443 BPAL2350-14
BankIt1966443 BPAL2353-14
BankIt1966443 BPAL2354-14
BankIt1966443 BPAL2507-14
BankIt1966443 BPAL2556-14
BankIt1966443 BPAL2766-15
BankIt1966443 BPAL2767-15
BankIt1966443 BPAL2768-15
BankIt1966443 BPAL2769-15
BankIt1966443 BPAL2770-15
BankIt1966443 BPAL2771-15
BankIt1966443 BPAL2772-15
BankIt1966443 BPAL2783-15
BankIt1966443 BPAL2784-15
BankIt1966443 BPAL2786-15
BankIt1966443 BPAL2946-15
BankIt1966443 BPAL2947-15
BankIt1966443 BPAL2951-15
BankIt1966443 BPAL2952-15
BankIt1966443 BPAL2968-15
BankIt1966443 BPAL2969-15
BankIt1966443 BPAL2971-15
BankIt1966443 BPAL2972-15
BankIt1966443 BPAL2973-15
BankIt1966443 BPAL2991-15
BankIt1966443 BPAL2992-15
BankIt1966443 BPAL2995-15
BankIt1966443 BPAL2997-15
BankIt1966443 BPAL2998-15
BankIt1966443 BPAL2999-15
BankIt1966443 BPAL3001-15
BankIt1966443 BPAL3002-15
BankIt1966443 BPAL3015-15
BankIt1966443 BPAL3019-15
BankIt1966443 BPAL3020-15
BankIt1966443 BPAL3023-15
BankIt1966443 BPAL3035-15
BankIt1966443 BPAL3036-15
BankIt1966443 BPAL3044-15
BankIt1966443 BPAL3048-15
BankIt1966443 BPAL3068-15
BankIt1966443 BPAL3069-15
BankIt1966443 BPAL3078-15
BankIt1966443 BPAL3079-15
BankIt1966443 BPAL3081-15
BankIt1966443 BPAL3082-15
BankIt1966443 BPAL3083-15
BankIt1966443 BPAL3086-15
BankIt1966443 BPAL3087-15
BankIt1966443 BPAL3089-15
BankIt1966443 BPAL3090-15
BankIt1966443 BPAL3124-15
BankIt1966443 BPAL3164-16
BankIt1966443 BPAL3165-16
BankIt1966443 BPAL3166-16
BankIt1966443 BPAL3167-16
BankIt1966443 BPAL3168-16
BankIt1966443 BPAL3169-16
BankIt1966443 BPAL3170-16
BankIt1966443 BPAL3173-16
BankIt1966443 BPAL3293-16
BankIt1966443 BPAL3294-16
BankIt1966443 BPAL3375-16
BankIt1966443 BPAL3475-16
BankIt1966443 BPAL3476-16
BankIt1966443 BPAL3477-16
BankIt1966443 BPAL3478-16
BankIt1966443 BPAL3479-16
BankIt1966443 BPAL3480-16
BankIt1966443 BPAL3482-16
BankIt1966443 BPAL3488-16
BankIt1966443 BPAL3489-16
BankIt1966443 BPAL3493-16
BankIt1966443 BPAL3496-16
BankIt1966443 BPAL3503-16
BankIt1966443 BPAL3504-16
BankIt1966443 BPAL3505-16
BankIt1966443 BPAL3512-16
BankIt1966443 BPAL3513-16
BankIt1966443 BPAL3514-16
BankIt1966443 M1
BankIt1966443 M10
BankIt1966443 M11
BankIt1966443 M12
BankIt1966443 M14
BankIt1966443 M15
BankIt1966443 M16
BankIt1966443 M17
BankIt1966443 M2
BankIt1966443 M20
BankIt1966443 M21
BankIt1966443 M22
BankIt1966443 M23
BankIt1966443 M25
BankIt1966443 M27
BankIt1966443 M3
BankIt1966443 M4
BankIt1966443 M5
BankIt1966443 M7
BankIt1966443 M8
BankIt1966443 M9
